# Supplementary material
Source: PubMed Central journal article supplement (PMC3000271)
Supplement: 1010011107_pnas.201010011SI.pdf [file 1010011107_pnas.201010011SI.pdf]

# Supporting Information

Varela-Nallar et al. 10.1073/pnas.1010011107

## SI Methods

**Live-Cell Imaging of Dendritic Spine Morphogenesis.** Live-cell experiments were performed at 37 °C on a thermostable closed-bath imaging chamber RC30WA (Warner Instruments). Secondary apical dendrites of 14 days in vitro (DIV) hippocampal neurons were selected from EGFP-positive neurons and selected for confocal time-lapse imaging in a Zeiss Axiovert 200M LSM PASCAL Confocal Laser Scanning Microscope. High-resolution (2,048 × 2,048 pixel) fluorescence images were acquired with an oil immersion 63×/1.4NA objective and a LP530 emission filter, with excitation at 488 nm. Confocal stacks (6–7.5 μm) from 20–25 serial images with a Z-step size of 0.3 μm and a pinhole diameter of 200 μm were acquired every 5 min for 1 h in the presence of vehicle (control) and for 2 h after the treatment with recombinant wingless-type family member 5A (Wnt-5a) ligand. Maximal intensity projections of the image stacks in each time were used to quantify the number of dendritic spines in each time lapse.

**Electrophysiology.** Recordings were filtered at 2.0–3.0 kHz, sampled at 4.0 kHz using an A/D converter, and stored with pClamp

10 (Molecular Devices). Evoked postsynaptic responses were analyzed off-line, using pClampfit analysis software (Molecular Devices) that allowed visual detection of events, computing only events that exceeded an arbitrary threshold. For control of Wnt-5a effect, we used medium for L cells, without Wnt-5a, diluted 1:100.

**Whole-Cell Patch Clamp.** The hippocampal neurons were stabilized at 22 °C for 30 min before starting the experiments. Current changes in the neurons were detected using the whole-cell patch-clamp technique with an Axopatch-700B amplifier (Axon Instruments, Inc., Molecular Devices) and a Nikon Eclipse TE200-u inverted microscope. The membrane potential was adjusted to –60 mV, and the current was recorded at 50-μs intervals and filtered at 2 kHz using commercially available software (Axon Instruments, Inc.). The patch electrodes were made of borosilicate (World Precision Instruments) and were prepared using a vertical pipette puller (Narishige). The resistance of the electrodes when filled with normal internal solution was less than 5 MΩ.

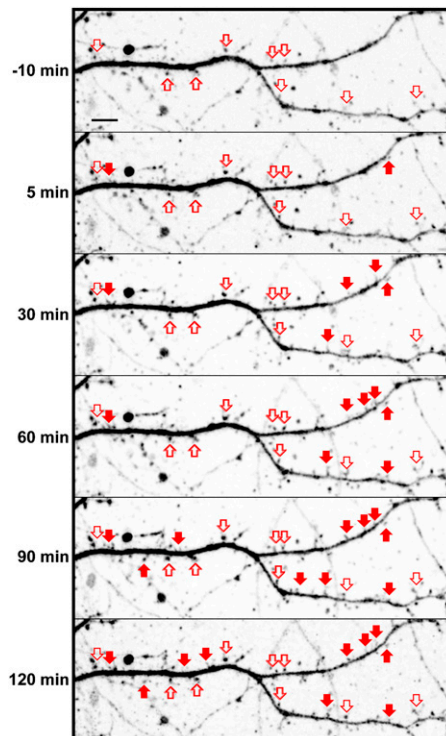

**Fig. S1.** Wnt-5a induces de novo formation of dendritic spines and modulates preexisting spine volume. Live-cell time-lapse imaging of an EGFP-transfected neuron dendrite shown before (–10 min) and after 5, 30, 60, 90, and 120 min of treatment with recombinant Wnt-5a (rWnt-5a). Filled arrows indicate de novo formation of dendritic spines. Empty arrows indicate modulation of preexisting spines volume. (Scale bar: 5 μm.)

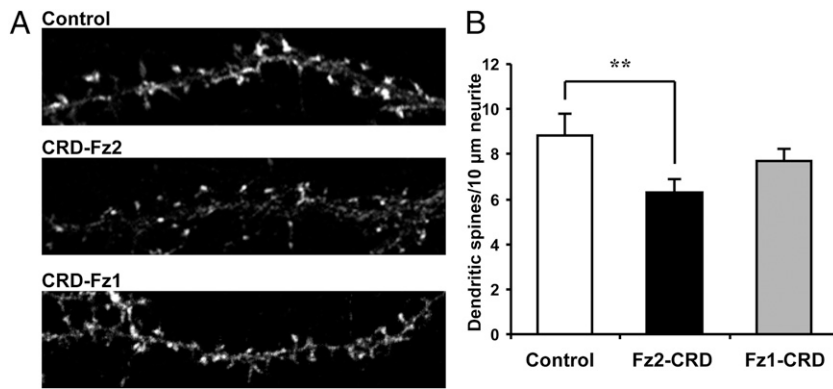

**Fig. S2.** Treatment with the soluble cysteine-rich domain (CRD) of Frizzled 2 (Fz2) decreases spine density. (A) Cultured hippocampal neurons at DIV 12 were incubated with 2 μg/mL Fz2-CRD or Fz1-CRD for 48 h. Dendritic spines were observed by immunodetection of drebrin (1), using a monoclonal anti-Drebrin antibody (Novus Biologicals). (B) Quantification of dendritic spine per 10-μm neurite length. Bars indicate mean ± SE from four different experiments. \*\* $P < 0.01$ .

1. Takahashi H, et al. (2003) Drebrin-dependent actin clustering in dendritic filopodia governs synaptic targeting of postsynaptic density-95 and dendritic spine morphogenesis. *J Neurosci* 23:6586–6595.



Wnt-5a

09:23

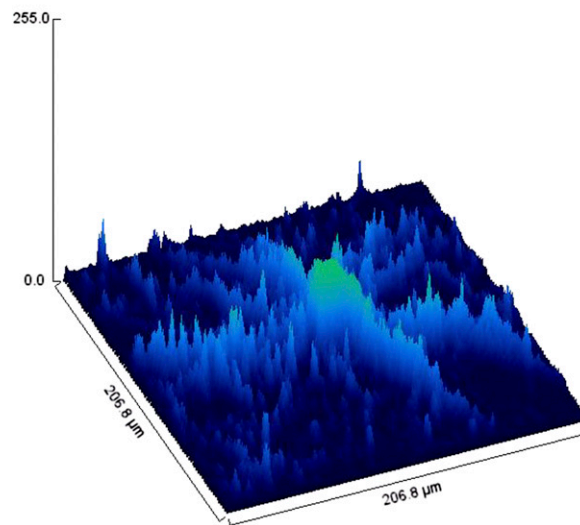

**Movie S1.** In mature DIV 14 hippocampal neurons, treatment with recombinant Wnt-5a induced a rapid, transient increase in the intensity of the calcium indicator Fluo-3 contained in the dendritic compartments.

[Movie S1](#)

vehicle

07:25

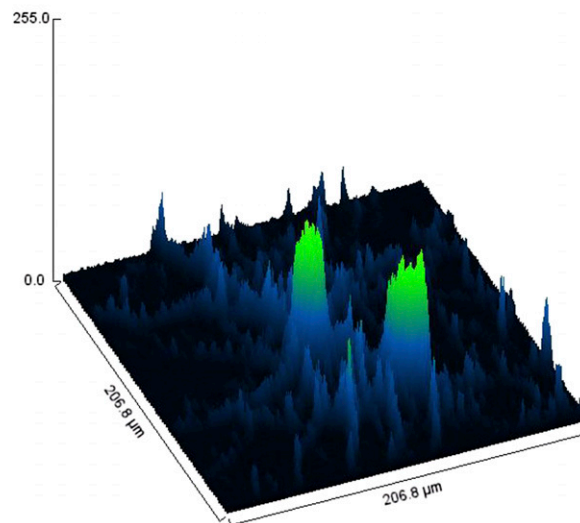

**Movie S2.** The maximal neurite intensity of the calcium-sensitive probe was significantly higher in Wnt-5a-treated neurons than in vehicle-treated neurons.

[Movie S2](#)
